# Supplementary material for: Understanding Young People and Their Care Providers’ Perceptions and Experiences of Integrated Care Within a Tertiary Paediatric Hospital Setting, Using Interpretive Phenomenological Analysis
Source: PubMed Central journal article supplement (PMC7597574; doi:10.5334/ijic.5545), 2020-10-27
Supplement: ijic-20-4-5545-s1.pdf [file ijic-20-4-5545-s1.pdf]

Supplementary file 1. Semi-structured interview guide – sample questions

| Cohort                    | Sample questions                                                                                                                                                                                                                                                                                                                                                                                                                                                                                                                                                                                                                                                                                                                                                                                                                                                                                                                                                                                                                                                                      |
|---------------------------|---------------------------------------------------------------------------------------------------------------------------------------------------------------------------------------------------------------------------------------------------------------------------------------------------------------------------------------------------------------------------------------------------------------------------------------------------------------------------------------------------------------------------------------------------------------------------------------------------------------------------------------------------------------------------------------------------------------------------------------------------------------------------------------------------------------------------------------------------------------------------------------------------------------------------------------------------------------------------------------------------------------------------------------------------------------------------------------|
| Children and young people | <ul style="list-style-type: none"> <li>• Can you please tell me about why you come to hospital?               <ul style="list-style-type: none"> <li>○ How does it feel coming to the hospital?</li> </ul> </li> <li>• How would you describe the way your doctors talk to you?</li> <li>• Do you get to choose what happens here at the hospital?</li> <li>• What other places do you go for your health care?</li> <li>• Do you like school? What do you like at school?</li> <li>• What don't you like at school?</li> <li>• What do you think could make you feel better?</li> <li>• What would make your experiences here better?</li> <li>• Is there anything else you would like to talk to me about?</li> </ul>                                                                                                                                                                                                                                                                                                                                                               |
| Parents                   | <ul style="list-style-type: none"> <li>• Can you please describe how much you understand your child's condition and care/treatment plans?</li> <li>• Can you please describe what your child's CCP nurse does for you and your child?</li> <li>• How would you describe your involvement in decision making for your child?</li> <li>• How would you describe the way the other health providers (doctors, allied health, nurses) treat your child?</li> <li>• How would you describe the way the other health providers (doctors, allied health, nurses) treat you as a parent/carer?</li> <li>• Do you believe that you are fully informed about your child's care plans and treatment, as much as you want to be?</li> <li>• Do you think all of your child's health providers speak to each other about your child?</li> <li>• How much attention do the health providers pay to you as the parent and carer of your child?</li> <li>• Do they ask you about your family and home everyday life?</li> <li>• Is there anything else you would like to talk to me about?</li> </ul> |
| Healthcare providers      | <ul style="list-style-type: none"> <li>• Can you please describe what you believe integrated care means?</li> <li>• What is your own experience of working in an integrated way?</li> <li>• Can you please describe what you know about the Connected Care program and its benefits to patients?</li> <li>• How well do you think you take into account the needs of the whole family, not just the child you are treating?</li> <li>• When providing care to these children with complex conditions, do you talk to other professionals?</li> <li>• How do you think the system you are working in could be improved for the care of children with complex and chronic conditions?</li> <li>• Is there anything in particular that prevents you from doing the job you personally would like to do?</li> <li>• Is there anything else you would like to talk to me about?</li> </ul>                                                                                                                                                                                                 |
