# Supplementary material for: Understanding Young People and Their Care Providers’ Perceptions and Experiences of Integrated Care Within a Tertiary Paediatric Hospital Setting, Using Interpretive Phenomenological Analysis
Source: PubMed Central journal article supplement (PMC7597574; doi:10.5334/ijic.5545), 2020-10-27
Supplement: ijic-20-4-5545-s2.pdf [file ijic-20-4-5545-s2.pdf]

Supplementary file 2. Demographics of participating caregivers

| <b>Variable</b>                                                                                                                      | <b>Number (%)</b> |
|--------------------------------------------------------------------------------------------------------------------------------------|-------------------|
| <b>Marital status</b>                                                                                                                |                   |
| Two parent household                                                                                                                 | 6 (100%)          |
| <b>Total number of dependents in household</b>                                                                                       |                   |
| One child                                                                                                                            | 1 (17%)           |
| Two children                                                                                                                         | 3 (50%)           |
| Three children                                                                                                                       | 2 (33%)           |
| <b>Socioeconomic Index for Areas (SEIFA), Index of Relative Socio-economic Advantage and Disadvantage (IRSAD) status<sup>a</sup></b> |                   |
| 10                                                                                                                                   | 2 (33%)           |
| 6                                                                                                                                    | 1 (17%)           |
| 4                                                                                                                                    | 1 (17%)           |
| 2                                                                                                                                    | 1 (17%)           |
| 1                                                                                                                                    | 1 (17%)           |
| <b>Working parents</b>                                                                                                               |                   |
| One parent                                                                                                                           | 2 (33%)           |
| Two parents                                                                                                                          | 4 (67%)           |
| <b>Carer</b>                                                                                                                         |                   |
| Mother (full-time carer)                                                                                                             | 2 (33%)           |
| Mother (carer + works/studies part-time)                                                                                             | 4 (67%)           |
| <b>Approximate time with Connected Care Program<sup>b</sup> at time of interview (self-reported)</b>                                 |                   |
| < 1 year                                                                                                                             | 2 (33%)           |
| 1-2 years                                                                                                                            | 2 (33%)           |
| 4+ years                                                                                                                             | 1 (17%)           |
| Unsure                                                                                                                               | 1 (17%)           |
| <b>Approximate number of clinical teams at time of interview (self-reported)</b>                                                     |                   |
| 4                                                                                                                                    | 2 (33%)           |
| 5-10                                                                                                                                 | 2 (33%)           |
| >10                                                                                                                                  | 1 (17%)           |
| Unsure                                                                                                                               | 1 (17%)           |

<sup>a</sup> Score 1-10 (1 = area of relatively greater disadvantage and a lack of advantage in general; 10 = lack of disadvantage and greater advantage in general)

<sup>b</sup> Established in 2013
