# Supplementary material for: Understanding Young People and Their Care Providers’ Perceptions and Experiences of Integrated Care Within a Tertiary Paediatric Hospital Setting, Using Interpretive Phenomenological Analysis
Source: PubMed Central journal article supplement (PMC7597574; doi:10.5334/ijic.5545), 2020-10-27
Supplement: ijic-20-4-5545-s3.pdf [file ijic-20-4-5545-s3.pdf]

| Superordinate theme         | Meaning                                                                                                                                        | Example quote                                                                                                                                                                                                   | Child 1 | Child 2 | Child 3 | Child 4 | Young person 1 | Young person 2 |
|-----------------------------|------------------------------------------------------------------------------------------------------------------------------------------------|-----------------------------------------------------------------------------------------------------------------------------------------------------------------------------------------------------------------|---------|---------|---------|---------|----------------|----------------|
| Knowledge and understanding | Reason for attending hospital, of their condition                                                                                              | “Interviewer: What do you do when you come here?<br>Interviewee: I don't know.” (Child 3, age 7 years)                                                                                                          | X       | X       | X       |         | X              |                |
| Engagement                  | Shared decision-making, choice, trust in staff, kindness, developmentally appropriate involvement in care, feeling safe                        | “Interviewee: They give her [mother] lots of information..<br>Interviewer: Mm-hm. Do they give you information?<br>Interviewee: No.<br>Interviewer: Just to your mum?<br>Interviewee: Yeah.” (Child 2, 8 years) | X       | X       | X       | X       | X              | X              |
| Comfort and safety          | Valuing family and home time; doesn't like to come; anxious and scared; likes comforts of home and family; trust and support; parents support. | “Interviewer: Where's your favourite place to go?<br>Interviewee 1: Home.” (Child 1, 10 years)                                                                                                                  | X       | X       | X       | X       | X              | X              |

Supplementary file 3. Superordinate themes within children and young people cohort
